# Supplementary material for: Synthesis, characterization, DNA-binding study and anticancer properties of ternary metal(ii) complexes of edda and an intercalating ligand
Source: Royal Society of Chemistry journal article supplement (doi:10.1039/b709269e), 2007-10-24

ESI: Data 1 and Data 2

**(i) Data 1:**

Viability of MCF-7 cells in the presence of 1,10-phenanthroline

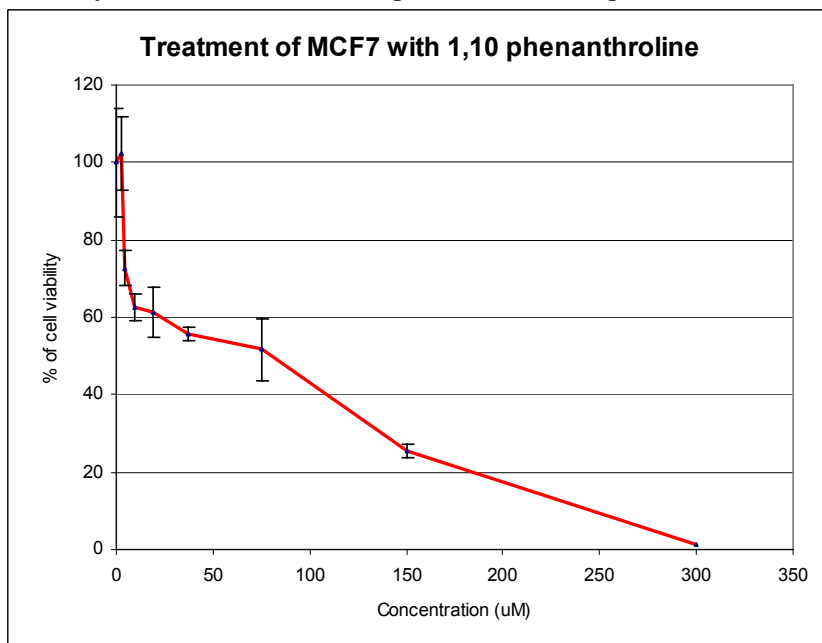

**(ii) Data 2:**

Viability of MCF-7 cells in the presence of Cu(edda). Plots (a) and (b) are from two independent sets of experiments

Plot (a)

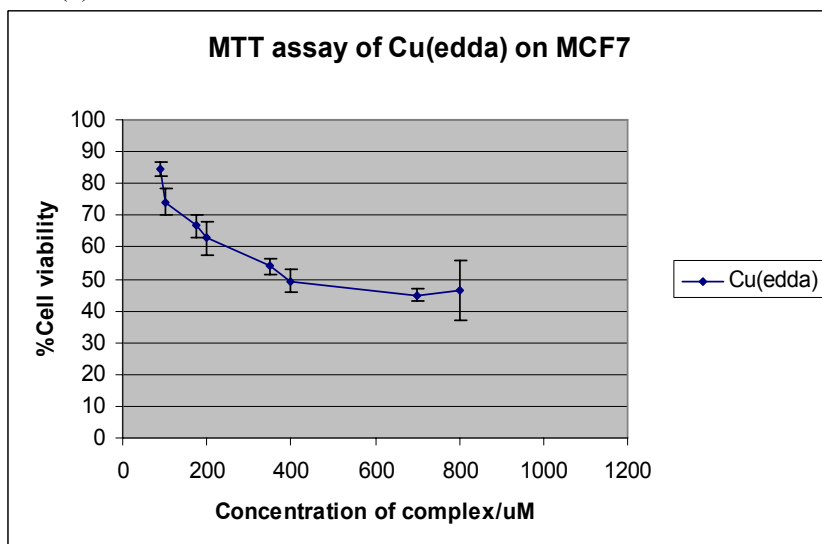

(ii)  
Plot (b)

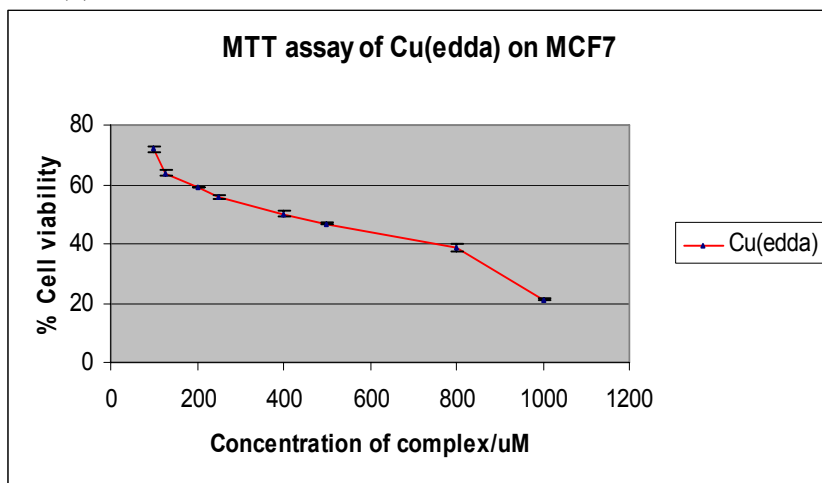

Supplement: b709269e.pdf [file b709269e.pdf]
